# Supplementary material for: Invasive Stratified Mucin-Producing Carcinoma (ISMC) of The Uterine Cervix: A Clinicopathological Study of 8 Cases
Source: Research Square preprint supplement (doi:10.21203/rs.3.rs-506323/v1), 2021-05-13
Supplement: Supplementary file 1 [file 85f846191acd2092943efea1.docx]

Figure1 A-F: ISMCs showed nests of stratified columnar cells with variable amounts of intracytoplasmic mucin, with round slightly irregular palisading infiltrating cervical stroma. A, B showed ISMC cells with strong peritumoral inflammatory response and finger-like pattern of invasion. C, D showed glandular morphology, representing cervical adenocarcinoma of the usual type, mixed with ISMCs. (A-D: H&E x 100, E-F: H&E x 200)
